# Supplementary material for: De Novo Assembly and Developmental Transcriptome Analysis of the Small White Butterfly Pieris rapae
Source: PubMed Central journal article supplement (PMC4948883; doi:10.1371/journal.pone.0159258), 2016-07-18

hsp10

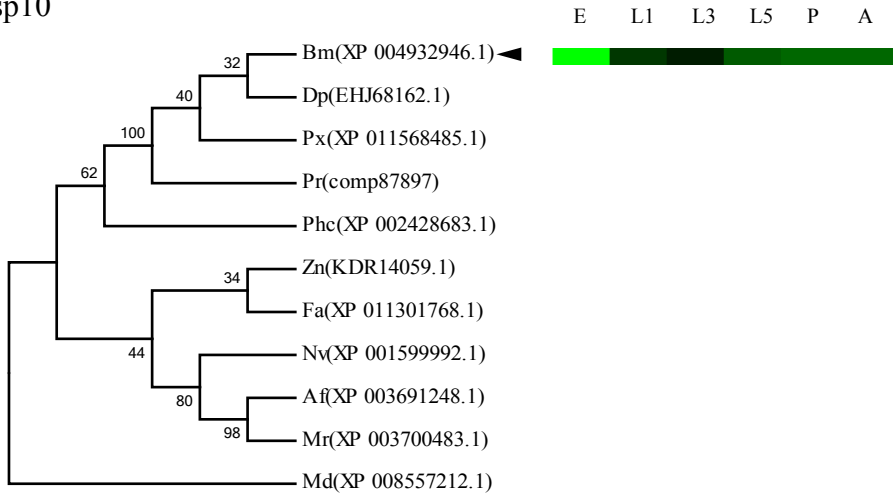

Color Key

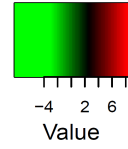

shsp

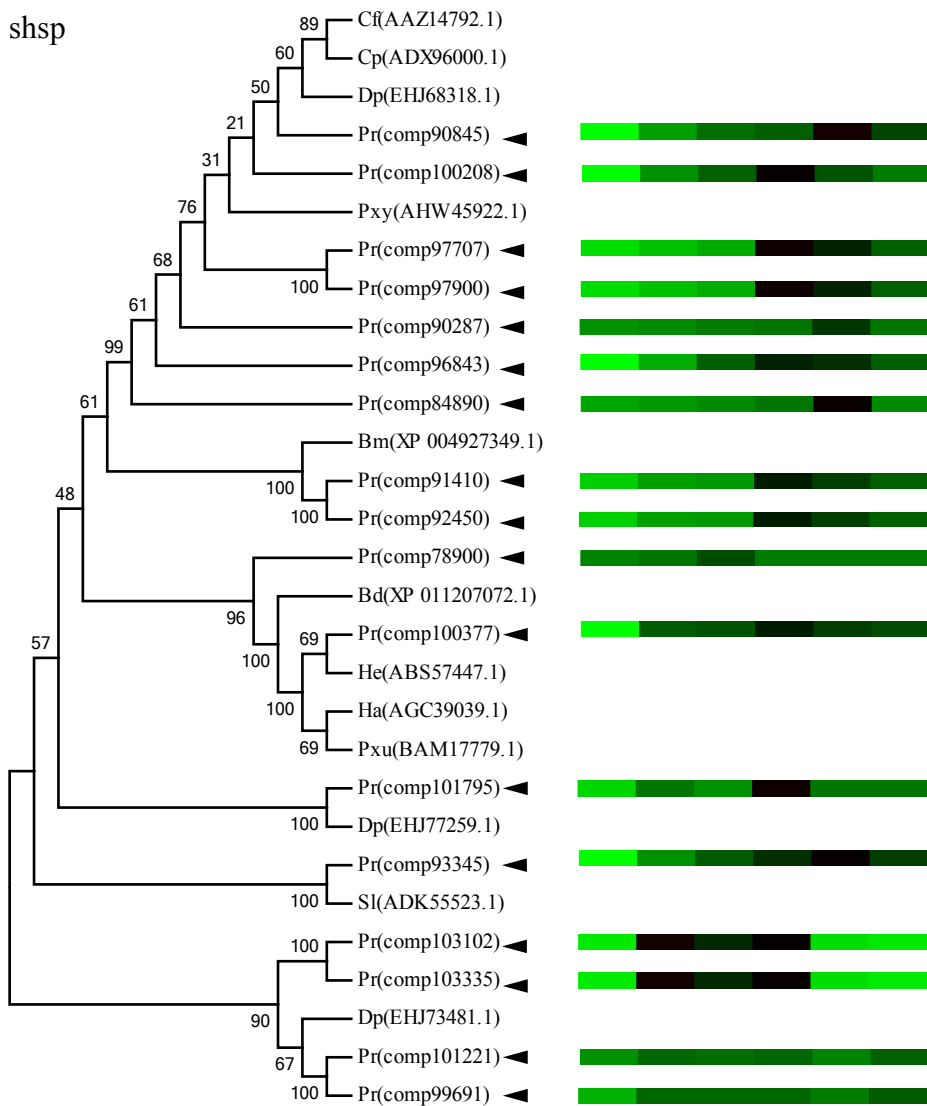

hsc70

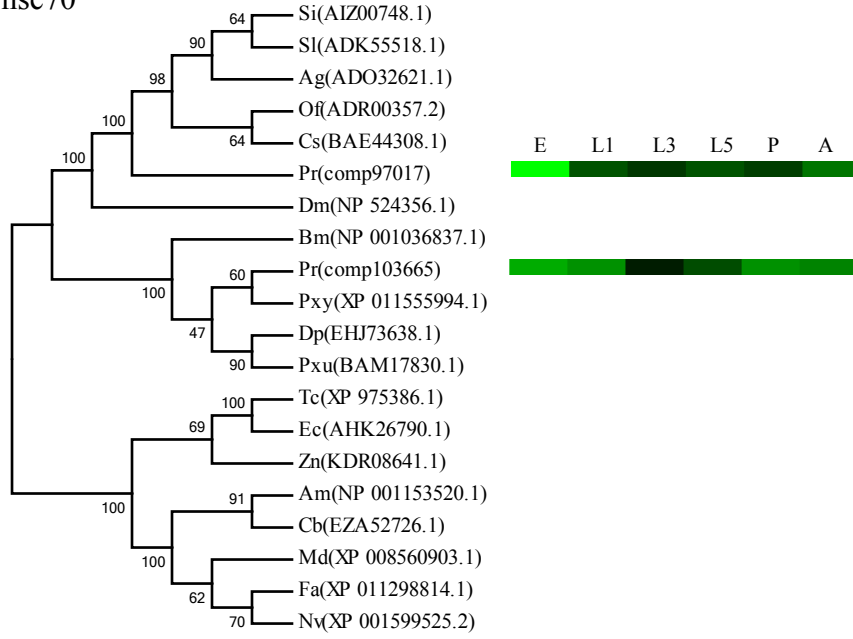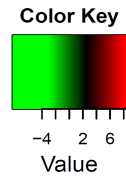

hsp70

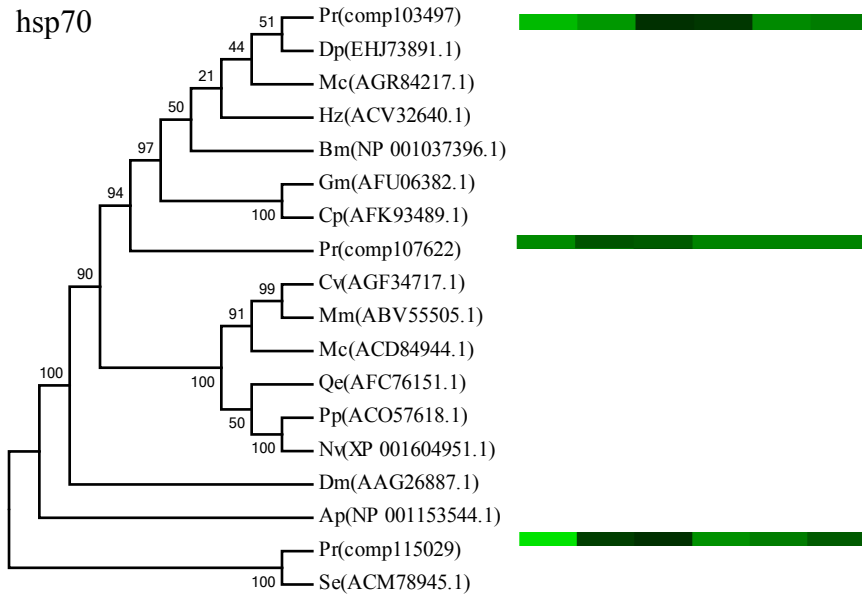

hsp90

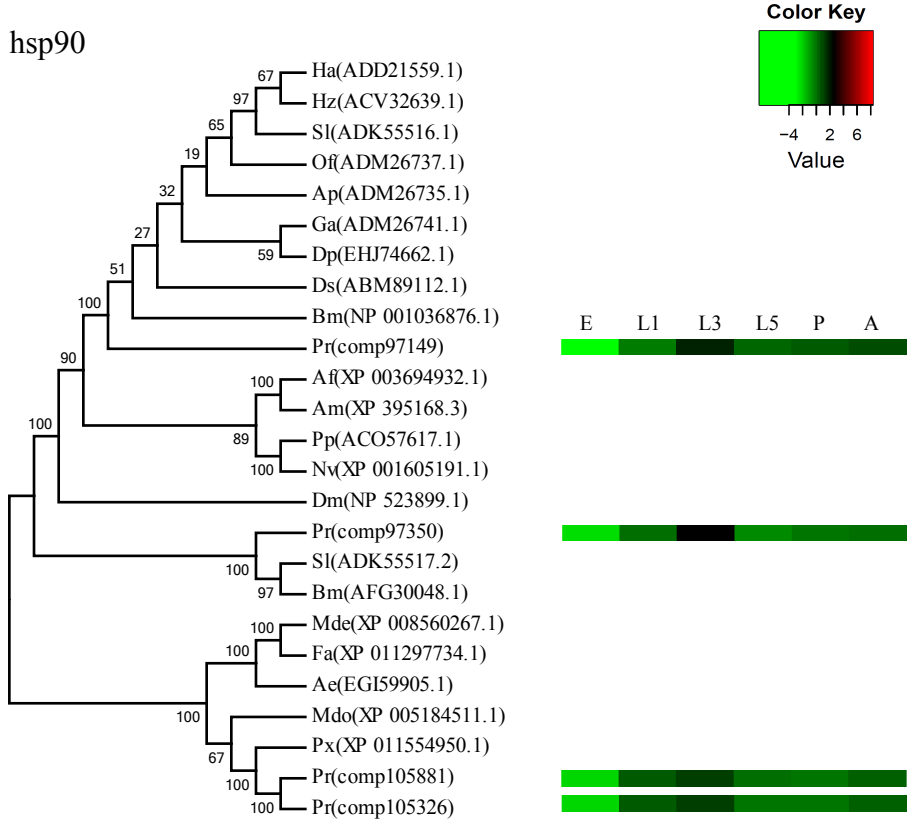

Supplement: pone.0159258.s005.pdf [file pone.0159258.s005.pdf]
